# Supplementary material
Source: MDPI journal article supplement (https://www.mdpi.com/2071-1050/10/5/1342)
Supplement: s1 [file s1]

## Sheet: Table S.1
Table S1. The detailed data of Embodied Carbon emissions in interregional exports and imports by region in 2012
	Provinces	code	Total Import	Total Export	Sum of Import and Export
	Beijing	1	5497.15	3755.42	9252.57
	Tianjin	2	3209.77	2371.22	5580.98
	Hebei	3	5048.87	9032.92	14081.8
	Shanxi	4	2635.2	3783.81	6419.01
	Inner mongolia	5	4123.82	5470.23	9594.05
	Liaoning	6	4578.04	6378.83	10956.9
	Jilin	7	3019.64	3068.5	6088.13
	Heihongjiang	8	3607.99	2737.66	6345.65
	Shanghai	9	5762.94	3584.17	9347.1
	Jiangsu	10	11531.9	12106.5	23638.4
	Zhejiang	11	6218.23	4697.73	10916
	Anhui	12	5047.15	6280.7	11327.9
	Fujian	13	1021.34	1194.55	2215.89
	Jiangxi	14	1795.15	1963.1	3758.25
	Shandong	15	3753.61	3072.31	6825.93
	Henan	16	6863.9	7630.03	14493.9
	Hubei	17	944.882	1065.45	2010.33
	Hunan	18	3627.67	3829	7456.67
	Guangdong	19	4708.85	3536.22	8245.07
	Guangxi	20	2410.49	1481.76	3892.25
	Hainan	21	857.622	566.056	1423.68
	Chongqin	22	3381.51	2581.62	5963.14
	Sichuan	23	1759.58	1717.7	3477.28
	Guizhou	24	1485.1	1946.87	3431.97
	Yunnan	25	2760.03	2017.86	4777.89
	Shannxi	26	4615.87	4013.89	8629.76
	Gansu	27	1522.22	1833.37	3355.59
	Qinghai	28	372.854	280.829	653.684
	Ningxia	29	652.528	1065.39	1717.92
	Xinjiang	30	2036.65	1786.79	3823.44

## Sheet: Table S.2
Table.S2 The detailed data of interprovincial flows of embodied carbon emission in 2012
	Import Export	1	2	3	4	5	6	7	8	9	10	11	12	13	14	15	16	17	18	19	20	21	22	23	24	25	26	27	28	29	30
	1		747.313	919.098	461.789	560.749	395.468	160.172	162.956	111.559	296.271	122.092	142.308	31.9569	42.3142	254.974	330.752	24.5887	80.2009	86.4744	30.9225	13.7851	51.8271	52.9305	50.3696	60.1636	118.603	73.025	8.32697	54.1703	51.9902
	2	483.333		461.261	31.1035	130.957	288.834	124.341	93.1167	74.9496	516.99	82.7896	131.537	17.2551	19.3134	146.057	217.47	20.1306	54.7955	42.7871	16.5824	11.8264	43.8945	25.0287	19.3397	25.1771	50.7749	33.8651	2.84264	11.6156	31.7976
	3	451.82	164.756		521.535	408.289	260.687	105.355	156.33	131.699	866.741	105.125	168.427	20.9677	39.6028	250.431	415.099	23.1582	127.409	83.0334	33.67	33.7513	80.7413	39.169	44.4378	50.7263	206.163	101.681	10.8443	39.6266	107.596
	4	126.821	69.593	513.478		218.541	127.535	70.0661	49.9135	71.302	344.825	89.6769	105.277	19.1177	18.3051	102.244	226.973	20.0251	65.4337	60.9453	16.5224	3.9996	56.9059	28.0874	14.7719	17.1886	102.412	29.4475	3.91966	42.901	18.9748
	5	230.217	142.817	438.782	143.107		312.008	218.607	141.203	158.696	662.526	165.785	189.567	44.8402	21.5674	141.811	237.181	34.5365	114.587	96.1534	29.6782	17.9479	143.444	39.9203	26.3578	33.6862	146.782	67.6597	6.25902	50.6371	67.4533
	6	240.042	121.258	432.005	85.295	298.179		496.659	407.555	152.237	641.679	190.19	172.354	50.3694	39.7223	148.469	282.14	29.9015	104.644	116.062	37.1514	15.7509	66.6896	34.6252	33.118	47.1903	141.302	55.9718	7.83243	36.1516	93.5005
	7	243.773	131.412	240.26	51.8353	149.892	687.041		318.538	179.163	224.701	92.0117	74.3572	24.7581	15.4854	61.4577	97.0543	10.2916	76.5498	57.3588	15.092	9.02307	43.4797	13.6275	17.6793	24.3558	73.658	31.1438	1.37718	14.1824	40.079
	8	93.4044	48.0681	210.34	36.1064	98.3747	807.722	627.241		95.3735	446.833	147.151	120.054	33.7117	26.8735	104.93	153.161	22.1737	115.532	75.7135	22.9361	9.90241	35.692	30.1403	23.2903	30.0803	58.7836	40.0595	5.74592	22.4036	66.1905
	9	124.746	98.154	348.266	217.513	277.309	326.659	131.524	138.323	0	973.554	783.617	439.671	88.8139	101.85	166.087	346.45	52.2859	151.173	179.652	52.0617	23.1946	60	60.3041	70.6252	91.0869	246.215	63.994	9.50636	39.7635	100.535
	10	243.1	140.724	1099.87	438.568	639.996	701.249	98.2336	156.988	533.852		774.168	1854.75	94.4516	350.728	289.817	1420.92	132.419	484.327	366.925	132.929	14.6137	126.199	113.929	144.188	215.656	442.846	170.946	20.588	121.126	207.749
	11	115.009	53.1488	549.547	268.781	363.407	311.002	69.6889	114.793	485.215	857.789		401.79	116.327	245.808	150.988	520.235	80.3401	248.133	207.326	79.4686	16.0993	60.1575	64.441	116.312	149.961	240.042	110.56	21.3905	71.5371	128.938
	12	115.499	56.9397	392.593	151.544	260.688	182.225	57.9145	92.0496	249.524	1157.21	333.666		45.6181	165.923	155.329	459.941	91.6232	221.703	138.454	53.2544	16.9618	54.7548	55.923	73.822	93.3408	178.294	75.009	5.82139	40.5939	70.9367
	13	13.6134	8.33116	75.7838	20.2724	45.2505	48.3009	22.2473	23.1975	29.0631	105.039	68.6157	43.5118		59.9456	21.4878	67.434	12.7269	62.0582	73.4653	20.7619	4.44837	15.471	17.7862	23.6287	34.5866	36.6649	20.1825	10.052	12.0557	25.359
	14	59.5976	17.0695	130.993	44.5431	83.705	46.6955	44.7639	46.4786	64.7777	161.533	111.062	406.255	39.5823		31.3669	154.127	23.4985	44.8037	39.6103	16.2947	7.51717	22.6599	24.2889	20.5545	33.1721	66.9055	20.2017	2.98353	10.6454	19.4658
	15	288.99	117.539	654.245	309.976	350.617	139.973	75.1616	153.754	89.7359	216.786	56.7089	162.672	6.62235	31.9101		270.214	15.5206	66.2256	34.5621	35.3096	18.9296	42.0336	21.0917	40.5401	51.171	285.173	56.8096	10.6839	28.8042	121.852
	16	265.796	110.109	866.978	254.948	365.118	395.451	135.089	114.923	277.576	962.735	312.122	491.285	58.6268	99.1224	355.177		98.2922	360.825	208.373	77.6376	16.27	170.504	92.0717	62.1205	77.5734	393.059	101.371	10.7753	57.6825	72.2839
	17	33.1864	7.69251	39.2488	83.931	56.0374	29.5599	17.6398	14.2425	11.0732	52.7291	38.8442	73.2664	21.5095	37.0529	21.9098	123.925		56.6558	46.3629	8.47507	2.24635	15.6481	24.6164	21.2556	11.7541	61.3905	9.18917	2.09706	11.2404	12.1021
	18	51.7245	24.7672	161.559	75.8928	100.241	169.448	44.1223	45.8284	114.636	783.223	144.141	206.383	45.5253	154.008	68.8231	319.592	80.2351		273.275	72.5446	30.6011	171.471	59.197	86.661	70.0072	144.429	53.9139	5.46796	27.7925	42.1572
	19	92.0044	36.8696	264.353	221.084	195.941	208.452	76.4144	74.273	113.405	414.959	221.527	176.107	135.163	181.532	131.65	304.817	56.9147	335.376		199.441	83.9333	141.739	110.654	248.395	167.921	230.015	94.1986	12.3807	65.3787	113.955
	20	42.4876	23.167	61.691	18.6514	41.0854	88.7365	86.2465	40.0568	109.145	388.15	122.877	103.539	44.6877	26.6433	47.0019	87.6535	26.2089	126.259	287.379		83.7211	205.081	48.5828	103.297	69.3657	66.8372	20.8202	2.45169	9.86808	28.7931
	21	11.944	8.09965	27.6753	6.06723	20.1046	29.1076	18.3817	20.4499	29.1049	98.371	29.6726	29.3889	13.6629	17.9851	12.7181	41.2168	7.56107	49.956	104.53	99.0417		28.605	17.3634	38.5635	46.918	18.332	12.8639	2.3169	4.9784	12.6422
	22	66.0004	34.1047	214.36	29.2169	114.59	141.557	50.5844	41.5828	70.9123	192.672	84.2684	114.438	23.629	64.8594	42.9911	294.261	34.3192	213.934	159.218	98.64	16.9726	0	286.639	300.114	220.111	204.584	128.352	19.7715	41.9278	76.9031
	23	23.3778	13.55	98.5571	18.9476	55.0964	71.2365	29.0883	34.995	28.5429	171.133	60.7779	61.9849	29.7089	26.6441	43.685	121.821	20.0585	98.1796	103.976	34.1808	6.9665	154.618		74.2621	91.7558	106.806	79.628	14.4598	29.816	55.7271
	24	24.7487	14.3159	64.042	14.508	44.4373	51.2254	25.0633	27.7532	46.7576	168.246	64.2012	66.3896	19.8134	24.7767	32.4965	81.6482	13.7604	98.3828	120.411	63.9961	18.9626	112.299	69.1523		98.2945	55.7643	26.326	2.51736	10.4761	24.3343
	25	45.2759	27.6479	96.896	14.2495	49.5682	125.385	78.5098	53.5894	94.1925	387.068	132.176	139.568	56.124	37.8586	56.1826	141.891	26.8354	114.176	210.489	118.798	42.0153	262.342	117.76	130.88		85.8284	46.7137	4.77881	16.5104	46.7176
	26	138.791	84.472	348.96	137.138	229.471	188.193	80.6038	79.7868	124.848	490.611	173.674	215.569	53.8626	62.3525	105.116	599.617	66.4017	207.518	196.253	57.558	21.5253	253.437	128.97	93.8489	109.946		168.543	19.9982	103.394	75.4076
	27	35.7614	21.3615	104.31	31.3931	89.6704	71.2694	40.915	38.7897	38.8488	156.886	56.0535	59.4029	20.8084	19.1745	40.6849	120.315	12.2173	47.0798	62.3419	19.3559	7.82933	61.477	62.7887	24.2617	37.3206	96.084		38.7323	62.3495	44.7399
	28	12.4962	10.4473	18.4121	3.74046	15.8846	14.0911	11.2805	7.8603	15.424	46.869	10.0965	16.3363	2.99604	3.06594	7.83404	17.2432	2.08118	9.45356	11.5787	3.47419	3.09966	19.0427	9.52959	5.83999	6.10098	18.7736	53.6158		4.514	11.6728
	29	19.1938	7.21309	47.9947	82.9812	103.85	25.9501	13.3191	18.6422	7.68523	31.4491	12.2196	13.0742	3.67855	5.13113	15.0294	51.997	4.76377	15.1515	10.9437	5.52831	1.09824	7.75451	16.6706	6.75917	7.52362	67.755	26.0979	6.1412		16.9327
	30	62.6633	30.277	151.361	9.08892	103.182	133.766	59.261	69.6934	74.8703	288.963	112.421	101.442	30.3645	23.548	65.5665	124.873	22.5764	78.48	82.5645	30.4571	13.0636	73.6537	52.4105	31.5754	45.7236	69.6151	61.1777	10.7666	23.2469

## Sheet: Table S.3
Table S3 The comparison of direct energy consumption, direct carbon emission and embodied carbon emission in China’s different provinces. (toe, stands for tones of oil equivalent)
	Province	Energy consumption (million toe)	GDP	Energy Per GDP	Population	Energy per capita
	Beijing	6831.23	17879.4	0.382072	17266000	3.95646
	Tianjin	8145.06	12893.9	0.6317	11791000	6.90786
	Hebei	29320.2	26575	1.1033	60806000	4.82193
	Shanxi	19862.8	12112.8	1.63981	30128000	6.59279
	Inner mongolia	18309.1	15880.6	1.15292	20775000	8.81302
	Liaoning	21803.4	24846.4	0.877526	36621000	5.95379
	Jilin	8559.79	11939.2	0.716946	22949000	3.72992
	Heihongjiang	11954.9	13691.6	0.873157	31990000	3.73708
	Shanghai	11084.6	20181.7	0.549241	19862000	5.58082
	Jiangsu	29863	54058.2	0.552424	66083000	4.51902
	Zhejiang	18826.4	34665.3	0.543091	45700000	4.11957
	Anhui	12011	17212	0.697826	49963000	2.40398
	Fujian	12109.7	19701.8	0.614651	31273000	3.87226
	Jiangxi	8055.36	12948.9	0.622089	37580000	2.14352
	Shandong	36511	50013.2	0.730026	80810000	4.51813
	Henan	22889.9	29599.3	0.773326	78483000	2.91655
	Hubei	16320.3	22250.5	0.73348	48219000	3.38461
	Hunan	15316.8	22154.2	0.691373	55394000	2.76507
	Guangdong	29593.3	57067.9	0.518562	88395000	3.34784
	Guangxi	9515.34	13035.1	0.729978	39066000	2.43571
	Hainan	1819.93	2855.54	0.637332	7397000	2.46036
	Chongqin	8592.73	11409.6	0.753114	24573000	3.49682
	Sichuan	19878.7	23872.8	0.832691	67386000	2.94997
	Guizhou	9708.78	6852.2	1.41688	29071000	3.33968
	Yunnan	10454.8	10309.5	1.0141	38874000	2.68942
	Shannxi	11222.5	14453.7	0.776443	31315000	3.58373
	Gansu	7521.45	5650.2	1.33118	21507000	3.49721
	Xinjiang	14926.1	7505.31	1.98874	18630000	8.01185
	Province	Direct carbon emissions (DCE, million ton)	GDP	DCE Per GDP	Population	DCE per capita
	Beijing	4149.04	17879.4	0.232057	17266000	2.40301
	Tianjin	6850.24	12893.9	0.531278	11791000	5.80972
	Hebei	26126.1	26575	0.983106	60806000	4.29663
	Shanxi	23381.1	12112.8	1.93028	30128000	7.76059
	Inner mongolia	22868.5	15880.6	1.44003	20775000	11.0077
	Liaoning	23215.1	24846.4	0.934345	36621000	6.3393
	Jilin	8396.3	11939.2	0.703252	22949000	3.65868
	Heihongjiang	11899.2	13691.6	0.869092	31990000	3.71968
	Shanghai	9750.37	20181.7	0.483129	19862000	4.90906
	Jiangsu	24695.9	54058.2	0.45684	66083000	3.73711
	Zhejiang	14473	34665.3	0.417507	45700000	3.16696
	Anhui	12085.4	17212.1	0.702146	49963000	2.41886
	Fujian	9720.49	19701.8	0.493381	31273000	3.10827
	Jiangxi	6661.18	12948.9	0.514421	37580000	1.77253
	Shandong	38099.6	50013.2	0.76179	80810000	4.71471
	Henan	19058.8	29599.3	0.643892	78483000	2.42839
	Hubei	12093.2	22250.5	0.543504	48219000	2.50798
	Hunan	9773.78	22154.2	0.44117	55394000	1.76441
	Guangdong	21384.4	57067.9	0.374719	88395000	2.41919
	Guangxi	7413.04	13035.1	0.568699	39066000	1.89757
	Hainan	2004.36	2855.54	0.701918	7397000	2.70969
	Chongqin	4787.86	11409.6	0.419634	24573000	1.94842
	Sichuan	12295.3	23872.8	0.515034	67386000	1.82461
	Guizhou	8509.72	6852.2	1.2419	29071000	2.92722
	Yunnan	7344.53	10309.5	0.712407	38874000	1.88932
	Shannxi	14384.7	14453.7	0.995228	31315000	4.59355
	Gansu	6625.43	5650.2	1.1726	21507000	3.08059
	Xinjiang	13707.6	7505.31	1.82639	18630000	7.35782
	Province	Emodied Carbon emissions (ECE)	GDP	ECE Per GDP	Population	ECE per capita
	Beijing	87740.8	17879.4	4.90737	17266000	50.8171
	Tianjin	18815.4	12893.9	1.45925	11791000	15.9574
	Hebei	51189.2	26575	1.92621	60806000	8.41844
	Shanxi	36664.9	12112.8	3.02695	30128000	12.1697
	Inner mongolia	24991.7	15880.6	1.57373	20775000	12.0297
	Liaoning	43549.1	24846.4	1.75273	36621000	11.8918
	Jilin	19395.4	11939.2	1.62451	22949000	8.45154
	Heihongjiang	24732.8	13691.6	1.80642	31990000	7.73141
	Shanghai	117864	20181.7	5.84013	19862000	59.3414
	Jiangsu	167756	54058.2	3.10324	66083000	25.3856
	Zhejiang	115909	34665.3	3.34366	45700000	25.363
	Anhui	24640.5	17212.1	1.43159	49963000	4.93176
	Fujian	22192.1	19701.8	1.1264	31273000	7.09625
	Jiangxi	15942.2	12948.9	1.23116	37580000	4.24219
	Shandong	94665.2	50013.2	1.8928	80810000	11.7145
	Henan	40130.8	29599.3	1.3558	78483000	5.11332
	Hubei	37494.4	22250.5	1.68511	48219000	7.77585
	Hunan	23661.5	22154.2	1.06804	55394000	4.27149
	Guangdong	66096.4	57067.9	1.15821	88395000	7.47739
	Guangxi	20067.7	13035.1	1.53951	39066000	5.13686
	Hainan	20161.8	2855.54	7.06059	7397000	27.2567
	Chongqin	25300.6	11409.6	2.21748	24573000	10.2961
	Sichuan	34295.5	23872.8	1.43659	67386000	5.08941
	Guizhou	17055.6	6852.2	2.48907	29071000	5.86688
	Yunnan	22351.5	10309.5	2.16806	38874000	5.74974
	Shannxi	20448.1	14453.7	1.41474	31315000	6.52982
	Gansu	14033	5650.2	2.48362	21507000	6.52484
	Xinjiang	23908.2	7505.31	3.18551	18630000	12.8332

## Sheet: Table S.4
Table S4 Carbon emissions coefficient; Energy consumption coefficient; Embodied carbon emissions coefficient by sectors
	Sectors	Carbon emissions coefficient by sectors	Energy consumption coefficient by sectors	Embodied carbon emissions coefficient by sectors
	Agriculture, Hunting, and Fishing	0.661619	2.97926e-05	1.97113e-05
	Mining and Washing of Coal	0.753962	5.63636e-05	4.2496e-05
	Exploitation of petroleum and natural gas and conventional natural gas industry	0.601593	4.324e-05	2.60129e-05
	Metals Mining and Dressing	0.733276	6.6128e-05	4.84901e-05
	Nonmetal Minerals Mining and Dressing	0.710639	6.30909e-05	4.48349e-05
	Food, Beverages and Tobacco	0.747254	4.02317e-05	3.00633e-05
	Textiles	0.750645	6.56627e-05	4.92894e-05
	Textile Products,Leather, feather and other products	0.72488	6.30116e-05	4.56759e-05
	Timber processing and furniture manufacturing	0.738913	6.43447e-05	4.75451e-05
	Paper Printing and educational and sports goods	0.750569	7.71488e-05	5.79054e-05
	Petroleum processing, coking and nuclear fuel processing	0.644429	7.11593e-05	4.58571e-05
	Chemical industry	0.73086	9.40904e-05	6.87668e-05
	Nonmetal Mineral Products	0.753783	9.50968e-05	7.16823e-05
	Smelting and Pressing of Metals	0.809221	0.000112339	9.09073e-05
	Metal Products industry	0.743592	0.000115632	8.59833e-05
	General equipment manufacturing	0.793845	9.5986e-05	7.6198e-05
	Special equipment manufacturing	0.71245	9.33122e-05	6.64803e-05
	Transport and Equipment industry	0.731776	8.84287e-05	6.471e-05
	Electric Equipment and Machinery manufacturing industry	0.72765	0.000111518	8.11461e-05
	Communication equipment, Computers and other electronic equipment manufacturing	0.699103	7.44841e-05	5.20721e-05
	Instrumentation	0.703033	7.824e-05	5.50054e-05
	Other Manufacturing	0.753128	8.66278e-05	6.52418e-05
	Waster and Flotsam	0.766268	2.21695e-05	1.69878e-05
	Metal products, Machinery and Equipment Repair Services	0.661599	9.49935e-05	6.28477e-05
	Product and Supply of Electricity and Heating Industry	0.75494	8.86993e-05	6.69626e-05
	Product and Supply of Gas Industry	0.747142	6.58547e-05	4.92028e-05
	Product and Supply of Water Industry	0.723698	5.70015e-05	4.12519e-05
	Construction	0.632444	0.000100983	6.38663e-05
	Leasing and Business Services	0.716966	2.24683e-05	1.6109e-05
	Transport, Warehousing and Postal Services	0.584437	5.88638e-05	3.44022e-05
	Hotels and Catering Services	0.716966	3.14621e-05	2.25572e-05
	Information Transmission, Software and Information Technology Services	0.640115	3.94711e-05	2.5266e-05
	Financial	0.640115	2.64439e-05	1.69271e-05
	Real Estate	0.640115	1.59479e-05	1.02085e-05
	Leasing and Business Services	0.673679	5.79613e-05	3.90473e-05
	Scientific research and Technical services	0.673679	5.70845e-05	3.84566e-05
	Water conservancy, environment and public facilities management industry	0.673679	5.09623e-05	3.43322e-05
	Services to Households and Other Services	0.673679	4.11851e-05	2.77455e-05
	Education industry	0.673679	2.00518e-05	1.35085e-05
	Sanitation, Social Security and Social Welfare	0.673679	6.40559e-05	4.31531e-05
	Culture,Sports and Entertainment industry	0.673679	3.68066e-05	2.47958e-05
	Public Management and Social Organization	0.673679	3.14812e-05	2.12082e-05
